# Supplementary material for: Evaluating Aspects of Online Medication Safety in Long-Term Follow-Up of 136 Internet Pharmacies: Illegal Rogue Online Pharmacies Flourish and Are Long-Lived
Source: J Med Internet Res. 2013 Sep 10;15(9):e199. doi: 10.2196/jmir.2606 (PMC3785996; doi:10.2196/jmir.2606)
Supplement: Supplementary file 1 [file jmir_v15i9e199_app1.pdf]

## Supplementary File

### *Website evaluation tool for the assessment and follow-up of Internet pharmacies*

| Question category              | Documented characteristics of online pharmacies                        | Variable                                                                |
|--------------------------------|------------------------------------------------------------------------|-------------------------------------------------------------------------|
| Identification of the operator | Domain name                                                            | URL                                                                     |
|                                | Year website was established                                           | date (year)                                                             |
|                                | Declared physical location of operation                                | world region & country & city                                           |
|                                | Telephone contact                                                      | telephone number                                                        |
|                                | Location of the server according to IP address                         | world region & country                                                  |
| Longevity                      | Functionality at the actual time of observation                        | yes, if website is accessible                                           |
|                                | Continuous operation for 4 years                                       | yes, if accessible at all observations                                  |
|                                | Reviving website                                                       | yes, if a functional website was inaccessible at any given time earlier |
| Products sold                  | Variety of drugs sold                                                  | brand / generic / both                                                  |
|                                | Type of drugs sold                                                     | prescription-only / over the counter medicines / both                   |
|                                | Number of active ingredients                                           | number                                                                  |
| Prescription requirement       | Requirement of prior medical prescriptions for prescription-only drugs | yes / no                                                                |
| Information exchange           | Availability of online consultation                                    | yes / no                                                                |
|                                | Requirement of patient's medical information in a questionnaire        | yes / no                                                                |
|                                | Availability of general product information                            | detailed / incomplete / not available                                   |
|                                | Availability of the patient information leaflet                        | detailed / incomplete / not available                                   |
| Payment and                    | Available payment methods (e.g. credit                                 | number of methods                                                       |

|                                                        |                                                           |                                                                             |
|--------------------------------------------------------|-----------------------------------------------------------|-----------------------------------------------------------------------------|
| delivery                                               | card, money transfer, PayPal)                             |                                                                             |
|                                                        | Delivery time                                             | days                                                                        |
|                                                        | Cost of delivery                                          | US dollars                                                                  |
|                                                        | Refund policy                                             | refund guarantee / no refund                                                |
| User friendliness and appearance (subjective elements) | User friendly navigation                                  | easy to use / medium / difficult to navigate                                |
|                                                        | General appearance and design                             | excellent / average / poor                                                  |
|                                                        | Customer feedback on website                              | displayed / not available                                                   |
| Legitimacy verification                                | Existence of legitimacy seal                              | type of logo                                                                |
|                                                        | Functionality of online logo                              | active link / inactive link                                                 |
|                                                        | Legitimacy according to LegitScript verification database | legitimate / unverified, unapproved / rogue / not available in the database |
